# Supplementary material for: Psychometric performance of the Kannada version of sarcopenia quality of life questionnaire (SarQoL®)
Source: PubMed Central journal article supplement (PMC10236591; doi:10.1186/s12891-023-06559-8), 2023-06-02
Supplement: 12891_2023_6559_MOESM6_ESM.pdf [file 12891_2023_6559_MOESM6_ESM.pdf]

**Supplementary material 6: Description of replacement of words in SarQoL®-Kannada**

| Words                               | Kannada literal meaning | Replacement                          |
|-------------------------------------|-------------------------|--------------------------------------|
| DIY (in question no. 3)             | No exact word           | Nimage iṣṭavāda kelasavannu māḍuvudu |
| Washing-up (in question no. 3)      | Toḷeyuvudu-ap           | Snāna māḍuvudu                       |
| hoovering (in question no. 4 & 17)  | nirvata suchigolivike   | Vyākyum klīniṅ māḍuvudu              |
| Arm rest (in question no. 17)       | No exact word           | Ārm reṣṭ                             |
| Banister (in question no. 17)       | No exact word           | Byāniṣṭar                            |
| Playing bridge (in question no. 22) | No exact word           | Kārḍ (ispīt) āḍuvudu                 |
