# Supplementary material for: Psychometric performance of the Kannada version of sarcopenia quality of life questionnaire (SarQoL®)
Source: PubMed Central journal article supplement (PMC10236591; doi:10.1186/s12891-023-06559-8), 2023-06-02
Supplement: 12891_2023_6559_MOESM7_ESM.pdf [file 12891_2023_6559_MOESM7_ESM.pdf]

**Supplementary material 7: Description of replacement of words in SarQoL®-Kannada**

| <b>Words</b>                             | <b>Kannada literal meaning</b>         | <b>Replacement</b>                                             |
|------------------------------------------|----------------------------------------|----------------------------------------------------------------|
| DIY (in question no. 3)                  | No exact word                          | Nimage iṣṭavāda kelasavannu māḍuvudu                           |
| Washing-up (in question no. 3)           | Toḷeyuvudu-ap (Referred Hindi version) | Snāna māḍuvudu                                                 |
| Vacuum cleaning (in question no. 4 & 17) | nirvata suchigolivike                  | Vyākyum klīniṅ māḍuvudu                                        |
| Arm rest (in question no. 17)            | No exact word                          | Kaḍime ettariruva (kaigaḷu) illade iruva kurciyinda mēlēḷuvudu |
| Banister (in question no. 17)            | No exact word (Referred Hindi version) | Byāniṣṭar (hyāṅḍ rēl)                                          |
| Playing bridge (in question no. 22)      | No exact word (Referred Hindi version) | Kārḍ (ispīt) āḍuvudu                                           |
