# Supplementary material for: Psychometric performance of the Kannada version of sarcopenia quality of life questionnaire (SarQoL®)
Source: PubMed Central journal article supplement (PMC10236591; doi:10.1186/s12891-023-06559-8), 2023-06-02
Supplement: 12891_2023_6559_MOESM8_ESM.pdf [file 12891_2023_6559_MOESM8_ESM.pdf]

**Supplementary material 8: Description of replacement of words in SarQoL®-Kannada**

| <b>Words</b>                                          | <b>Initial choice</b> | <b>Replacement</b>                       |
|-------------------------------------------------------|-----------------------|------------------------------------------|
| Some (in question no. 1)                              | Kelavu                | Svalpa maṭṭige                           |
| Light (in question no. 3)                             | Laghuvāda             | Haguravāda                               |
| Moderate (in question no. 4)                          | Madhyama              | Kaṣṭakaravallada                         |
| Physical appearance (in question no. 13)              | Daihika rūpadalli     | Dēhada ākāradalli                        |
| Squatting or Kneeling (in question no. 17; item 4)    | Maṇḍiyūruvudu         | Keḷage kuḷitukoḷḷuvudu/<br>Maṇḍiyūruvudu |
| Stooping or leaning down (in question no. 17; item 5) | Baggi tegeyuvudu      | Ettikoḷḷuvudu                            |
| Limit your movement? (in question no. 18)             | Mitagoḷisuttideyē?    | Aḍḍi goḷisuttiddeyē?                     |
| Changed? (in question no.21)                          | Badalāvaṇeyāgide?     | Badalāgide                               |
