# Supplementary material for: Psychometric performance of the Kannada version of sarcopenia quality of life questionnaire (SarQoL®)
Source: PubMed Central journal article supplement (PMC10236591; doi:10.1186/s12891-023-06559-8), 2023-06-02
Supplement: 12891_2023_6559_MOESM9_ESM.pdf [file 12891_2023_6559_MOESM9_ESM.pdf]

**Supplementary material 9: Description of alternative item statement used in SarQoL®-Kannada**

| <b>Words</b>                                                                                                                                                                                          | <b>Initial choice</b>                                                                                                                                                                                                                                                          | <b>Replacement</b>                                                                                                                                                                                                                                                                       |
|-------------------------------------------------------------------------------------------------------------------------------------------------------------------------------------------------------|--------------------------------------------------------------------------------------------------------------------------------------------------------------------------------------------------------------------------------------------------------------------------------|------------------------------------------------------------------------------------------------------------------------------------------------------------------------------------------------------------------------------------------------------------------------------------------|
| Choose as many answers as you like (in question no. 7)                                                                                                                                                | Ī keḷagina āykegaḷalli nimage iṣṭavāda ondakkinta heccina āykegaḷannu āydukoḷlabahudu                                                                                                                                                                                          | Nīvu iṣṭapaḍuvaṣṭu uttaragaḷannu āydukoḷlabahudu                                                                                                                                                                                                                                         |
| I feel a weakness in the muscles (in question no. 7; item 3)                                                                                                                                          | Nānu snāyugaḷalli daurbalyavannu hondiddēne                                                                                                                                                                                                                                    | Nanna snāyugaḷu durbalavāgive endu bhāvisuttēne                                                                                                                                                                                                                                          |
| I've had to face the death of several people close to me (in question no. 7; item 5)                                                                                                                  | Nanna hattiradavara halavāru janara sāvannu nānu edurisiruttēne                                                                                                                                                                                                                | Nanna hattiradavara halavāru janara sāvannu nōḍiddēne                                                                                                                                                                                                                                    |
| I do not have much energy, I am often tired (in question no. 3; item 6)                                                                                                                               | Nānu śaktihīnanāgiruttēne                                                                                                                                                                                                                                                      | Nanage heccu śakti illa                                                                                                                                                                                                                                                                  |
| My eyesight is poor (in question no. 7; item 7)                                                                                                                                                       | Nānu kaḷape dṛṣṭiyānu hondiddēne                                                                                                                                                                                                                                               | Nanna kaṇṇina dṛṣṭi mandavāgide                                                                                                                                                                                                                                                          |
| Do you feel physically weak? (question no.8)                                                                                                                                                          | Nīvu daihikavāgi daurbalyavannu anubhavisuttiddīrā?                                                                                                                                                                                                                            | Nīvu daihikavāgi durbalarāgiddīrā?                                                                                                                                                                                                                                                       |
| Do you feel you are limited in: (question no. 9)                                                                                                                                                      | Ivugaḷalli nīvu sīmitarendu bhāvisuttīrā?                                                                                                                                                                                                                                      | Ī keḷagina caṭuvaṭikegaḷalli                                                                                                                                                                                                                                                             |
| The length of your steps (question 9; item 5)                                                                                                                                                         | Hejje iṭṭu                                                                                                                                                                                                                                                                     | Hejje iṭṭu (Hejjeḷa naḍuvina antara)                                                                                                                                                                                                                                                     |
| Choose as many answers as you like (in question no. 14)                                                                                                                                               | Ī keḷaginavugaḷalli ondakkinta heccina āykegaḷannu āydukoḷlabahudu                                                                                                                                                                                                             | Ī keḷaginavugaḷalli nim'ma āykegaḷannu āydukoḷlabahudu                                                                                                                                                                                                                                   |
| Loss of height (in question no. 14; item 3)                                                                                                                                                           | Ettarada naṣṭavāgide                                                                                                                                                                                                                                                           | Ettara kaḍimeyāgide                                                                                                                                                                                                                                                                      |
| Loss of muscle mass (in question no. 14; item 4)                                                                                                                                                      | Snāyu (mānsa khaṇḍa) vina balavannu kaḷedukoḷḍiddēne                                                                                                                                                                                                                           | Mānsakhaṇḍagaḷu (snāyugaḷu) kṣṇīsuttive                                                                                                                                                                                                                                                  |
| Hair loss (in question no. 14; item 5)                                                                                                                                                                | Kūḍalu uduruvikeyannu hondiddēne                                                                                                                                                                                                                                               | Kūḍalu uduruttide                                                                                                                                                                                                                                                                        |
| Getting white or grey hair (in question no. 14; item 6)                                                                                                                                               | Biḷi athavā būdu baṇṇada kūḍalannu hondiddēne                                                                                                                                                                                                                                  | Kūḍalu biḷiyāguttide                                                                                                                                                                                                                                                                     |
| Choose as many answers as you like (in question no. 19)                                                                                                                                               | Nimage iṣṭavādaṇṭaha ondakkinta heccina āykeyannu āydukoḷlabahudu                                                                                                                                                                                                              | Nim'ma āykegaḷannu āydukoḷlabahudu                                                                                                                                                                                                                                                       |
| I am not sexually active (in question no. 20; item 1)                                                                                                                                                 | Nānu laiṅgika āsaktiyannu hondilla                                                                                                                                                                                                                                             | Nānu laiṅgika āsaktiyannu hondilla (laiṅgikavāgi sakriyavāgilla)                                                                                                                                                                                                                         |
| How has your participation in leisure activities (going out to eat, gardening, doing DIY, shooting/fishing, senior citizens clubs, playing bridge, going for a walk, etc.) changed? (question no. 22) | Hēge nim'ma biḍuvina (virāmada) samayada caṭuvaṭikegaḷa bhāgavahisuvike (Tinnalu horage hōguvudu, tōṭagārike, nimage iṣṭavāda yāvudē kelasavannu māḍuvudu, śūṭiṅg/ mīnu hiḍiyuvudu, hiriya nāgarikara klabge hōguvudu, kārḍ(isṭiṭ) aḍuvudu, vākiṅ māḍuvudu ityādi) Badalāgide? | Nim'ma biḍuvina (virāmada) samayada caṭuvaṭikegaḷalli (Tinnalu horage hōguvudu, tōṭagārike, nimage iṣṭavāda yāvudē kelasavannu māḍuvudu, śūṭiṅg/ mīnu hiḍiyuvudu, hiriya nāgarikara klabge hōguvudu, kārḍ(isṭiṭ) aḍuvudu, vākiṅ māḍuvudu ityādi) nim'ma bhāgavahisuvike hēge badalāgide? |
