# Supplementary material for: Psychometric performance of the Kannada version of sarcopenia quality of life questionnaire (SarQoL®)
Source: PubMed Central journal article supplement (PMC10236591; doi:10.1186/s12891-023-06559-8), 2023-06-02
Supplement: 12891_2023_6559_MOESM10_ESM.pdf [file 12891_2023_6559_MOESM10_ESM.pdf]

**Supplementary material 10: Feedback from the participants after testing of pre-final version**

| Question number | Words difficult to understand                                    | Number of participants |
|-----------------|------------------------------------------------------------------|------------------------|
| Question no. 1  | Tōḷugaḷallina, Snāyu, namyate, nim'ma snāyuvina namyate?         | 2                      |
| Question no. 4  | Kaṣṭakaravallada, vyākyūm klīniṅ māḍuvudu, tōṭadallina kaḷeyannu | 3                      |
| Question no. 6  | Prastuta                                                         | 2                      |
| Question no. 9  | Nīvu eṣṭu bāri naḍedukoṇḍu hōgaballiri?                          | 1                      |
| Question no. 11 | Samatōlanadalli                                                  | 2                      |
| Question no. 15 | Asamādhānagoṇḍiddīrā                                             | 2                      |
| Question no. 17 | Byānistar (hyāṇḍrēl), Ettariruva, (Ārms rest)                    | 3                      |
