# Supplementary material for: Psychometric performance of the Kannada version of sarcopenia quality of life questionnaire (SarQoL®)
Source: PubMed Central journal article supplement (PMC10236591; doi:10.1186/s12891-023-06559-8), 2023-06-02
Supplement: 12891_2023_6559_MOESM11_ESM.pdf [file 12891_2023_6559_MOESM11_ESM.pdf]

**Supplementary material 11: Changes in the words/sentences after discussion of participants feedback with the experts**

|                                                                                                                                                                                                       |                                                                                                                                                                                                                                                                                        |                                                                                                                                                                                                                                                                                                    |
|-------------------------------------------------------------------------------------------------------------------------------------------------------------------------------------------------------|----------------------------------------------------------------------------------------------------------------------------------------------------------------------------------------------------------------------------------------------------------------------------------------|----------------------------------------------------------------------------------------------------------------------------------------------------------------------------------------------------------------------------------------------------------------------------------------------------|
| Muscle (in question no. 1; item 3)                                                                                                                                                                    | Snāyu                                                                                                                                                                                                                                                                                  | Added Mānsakhaṇḍa in brackets                                                                                                                                                                                                                                                                      |
| In your arms (in question no. 1; item 1)                                                                                                                                                              | Tōḷugaḷallina                                                                                                                                                                                                                                                                          | Kaigaḷallina                                                                                                                                                                                                                                                                                       |
| Your muscle flexibility (in question no. 1; item 6)                                                                                                                                                   | Nim'ma snāyuvina namyate?                                                                                                                                                                                                                                                              | Nim'ma snāyuvina (mānsakhaṇḍada) namyate? [Nim'ma mānsa khaṇḍagaḷu sulabhavāgi dēhavannu baggisalu mattu kaikālugalaṇṇu maḍacalu mattu cācalu sahaḱarīsuttiveye?]                                                                                                                                  |
| Vacuum cleaning (in question no. 4)                                                                                                                                                                   | Vyākyūm klīniṅ                                                                                                                                                                                                                                                                         | Guḍisuvudu, oresuvudu                                                                                                                                                                                                                                                                              |
| Moderate (in question no.4)                                                                                                                                                                           | Kaṣṭakaravallada                                                                                                                                                                                                                                                                       | Tumbā kaṣṭavallada                                                                                                                                                                                                                                                                                 |
| Pulling up weed in the garden (in question no. 4)                                                                                                                                                     | Tōṭadallina kaḷeyannu tegeyuvudu                                                                                                                                                                                                                                                       | Tōṭadallina hullu athavā bēḍavāda giḍagaḷannu tegeyuvudu                                                                                                                                                                                                                                           |
| Currently (in question no. 6)                                                                                                                                                                         | Prastuta                                                                                                                                                                                                                                                                               | Īga                                                                                                                                                                                                                                                                                                |
| Do you have problems with your balance? (question no. 11)                                                                                                                                             | Nim'ma samatōlanadalli samasyeyannu hondiruvirā?                                                                                                                                                                                                                                       | Nim'ma samatōlanadalli (byā lens – nēravāgi nilluvāga athavā naḍeyuvāga om'mege bīḷuvante āguttadeyē?) Samasyeyannu hondiruvirā?                                                                                                                                                                   |
| Going up one or several steps without holding on to the banister (in question no. 17; item 3)                                                                                                         | Byānistar (hyāṇḍ rēl) annu hiḍidukoḷḷade ondu athavā halavāru mahāḍiya meṭṭilannu hattuvudu                                                                                                                                                                                            | Meṭṭilu hattuvāga gōḍe athavā bēre yāvudara sahāyavillade ondu athavā halavāru meṭṭilugaḷannu hattuvudu                                                                                                                                                                                            |
| Getting out of a low chair without arm rests (in question no. 17; item 7)                                                                                                                             | Kaḍime ettaraviruva kaigaḷillade (ārm rest) iruva kurciyinda mēḷēḷuvudu                                                                                                                                                                                                                | Kaḍime ettara iruva kaigaḷillada athavā hiḍiyalu ēnū illada kurciyinda ēḷuvudu                                                                                                                                                                                                                     |
| How has your participation in leisure activities (going out to eat, gardening, doing DIY, shooting/fishing, senior citizens clubs, playing bridge, going for a walk, etc.) changed? (question no. 22) | Nim'ma biḍuvina (virāmada) samayada caṭuvaṭikegaḷalli (tinnalu horage hōguvudu, tōṭagārike, nimage iṣṭavāda yāvudē kelasavannu māḍuvudu, sūṭiṅ/ mīnu hiḍiyuvudu, hiriya nāgarikara klabge hōguvudu, kārd(iṣṭi) āḍuvudu, vākiṅ māḍuvudu ityādi) nim'ma bhāgavahisuvike hēge badalāgide? | Nim'ma biḍuvina (virāmada) samayada caṭuvaṭikegaḷalli (samārambhagaḷalli bhāgavahisuvudu, tōṭagārike, nimage iṣṭavāda yāvudē kelasavannu māḍuvudu, makkaḷonḍige āṭa āḍuvudu, hiriya nāgarikara klabge hōguvudu, kārd(iṣṭi) āḍuvudu, vākiṅ māḍuvudu ityādi) nim'ma bhāgavahisuvike hēge badalāgide? |
