# Supplementary material for: Psychometric performance of the Kannada version of sarcopenia quality of life questionnaire (SarQoL®)
Source: PubMed Central journal article supplement (PMC10236591; doi:10.1186/s12891-023-06559-8), 2023-06-02
Supplement: 12891_2023_6559_MOESM12_ESM.pdf [file 12891_2023_6559_MOESM12_ESM.pdf]

## Supplementary material 12: Summarization of the results of all the phases of translation and cross-cultural adaptation

| Q. No. | Original                                                                                                                                                                                                    | Phase 1                                                                                                                                                                                                                                                                                                         |                                                                                                                                                                                                                                                                 | Phase 2                                                                                                                                                                                                                                                                                                | Phase 3                                                                                                                                                                                                          |                                                                                                                                                                                                              | Phase 4                                                                                                                                                                                                                                                                                      | Phase 5                                       | Final version                                                                                                                                                                                                                                                                                                                                                                                          |
|--------|-------------------------------------------------------------------------------------------------------------------------------------------------------------------------------------------------------------|-----------------------------------------------------------------------------------------------------------------------------------------------------------------------------------------------------------------------------------------------------------------------------------------------------------------|-----------------------------------------------------------------------------------------------------------------------------------------------------------------------------------------------------------------------------------------------------------------|--------------------------------------------------------------------------------------------------------------------------------------------------------------------------------------------------------------------------------------------------------------------------------------------------------|------------------------------------------------------------------------------------------------------------------------------------------------------------------------------------------------------------------|--------------------------------------------------------------------------------------------------------------------------------------------------------------------------------------------------------------|----------------------------------------------------------------------------------------------------------------------------------------------------------------------------------------------------------------------------------------------------------------------------------------------|-----------------------------------------------|--------------------------------------------------------------------------------------------------------------------------------------------------------------------------------------------------------------------------------------------------------------------------------------------------------------------------------------------------------------------------------------------------------|
|        |                                                                                                                                                                                                             | Translator 1                                                                                                                                                                                                                                                                                                    | Translator 2                                                                                                                                                                                                                                                    | Version 1                                                                                                                                                                                                                                                                                              | Translator 3                                                                                                                                                                                                     | Translator 4                                                                                                                                                                                                 | Pre-test version                                                                                                                                                                                                                                                                             | Tested                                        |                                                                                                                                                                                                                                                                                                                                                                                                        |
| 1      | Do you currently feel you have a reduction in:<br>The strength in your arms?<br>The strength in your legs?<br>Your muscle mass?<br>Your energy?<br>Your physical capabilities?<br>Your general flexibility? | Nimage ī keḷaḡinavugaḷalli yāvudu modaliginta kaḍime anisuttide:<br>Kaigaḷallina śakti?<br>Kālugaḷa śakti?<br>Snāyu (mānsa khaṇḍa) gaḷa śakti?<br>Nim'ma śakti?<br>Nim'ma daihika sāmārthya?<br>Nim'ma snāyuvina namyate? (Phleksibiliṭi)                                                                       | Prastuta nimage ī keḷaḡinavugaḷalli yāvudādaru kaḍimeyāḡideyē endu anisuttadeyē?<br>Nim'ma tōḷugaḷallina śakti?<br>Nim'ma kālugaḷa śakti?<br>Nim'ma sāmārthya?<br>Snāyusakti<br>nim'ma sāmārthya?<br>Nim'ma daihika sāmārthyagaḷu?<br>Nim'ma snāyuvina namyate? | Prastuta nimage ī keḷaḡinavugaḷalli yāvudādarū kaḍimeyāḡideyē e0du anisuttideyē?<br>Nim'ma tōḷugaḷallina śakti?<br>Nim'ma kālugaḷa śakti?<br>Snāyu śakti?<br>Nim'ma sāmārthya?<br>Nim'ma daihika sāmārthyagaḷu?<br>Nim'ma snāyuvina namyate?                                                           | Do you feel there is decrease in any of the following?<br>Strength of your arms?<br>Strength of your legs?<br>Muscle strength?<br>Your strength?<br>Your physical abilities?<br>Your muscle flexibility?         | 1. At present, do you feel any of the following has lessened?<br>Strength of the arms?<br>Strength of the limbs?<br>Power of muscles?<br>Your Capability?<br>Physical Stamina?<br>Flexibility of muscles?    | Prastuta nimage ī keḷaḡinavugaḷalli yāvudādarū kaḍimeyāḡideyē e0du anisuttideyē?<br>Nim'ma tōḷugaḷallina śakti?<br>Nim'ma kālugaḷa śakti?<br>Snāyu śakti?<br>Nim'ma sāmārthya?<br>Nim'ma daihika sāmārthyagaḷu?<br>Nim'ma snāyuvina namyate?                                                 | Snāyu<br>Namyate<br>Nim'ma snāyuvina namyate? | Prastuta nimage ī keḷaḡinavugaḷalli yāvudādarū kaḍimeyāḡideyē e0du anisuttideyē?<br>Nim'ma kaigaḷallina śakti?<br>Nim'ma kālugaḷa śakti?<br>Snāyu (mānsakhaṇḍagaḷa) śakti?<br>Nim'ma sāmārthya?<br>Nim'ma daihika sāmārthyagaḷu?<br>Nim'ma snāyuvina (mānsakhaṇḍada) namyate?<br>[Nim'ma mānsa khaṇḍagaḷu sulabhavāḡi dēhavannu baggisalu mattu kaikālugaḷannu maḍacalu mattu cācalu saharisuttiveye?] |
| 2      | Do you have pain in your muscles?<br>Often<br>Sometimes<br>Rarely<br>Never                                                                                                                                  | Nimage snāyu (mānsakhaṇḍa) gaḷalli nōvideyē?<br>Āḡāga<br>kelavom'me<br>aparūpakke (viraḷa)<br>endigū illa                                                                                                                                                                                                       | Nim'ma snāyugaḷalli nōvu ideyē?<br>Āḡāga<br>kelavom'me<br>viraḷavāḡi<br>endigū                                                                                                                                                                                  | Nim'ma snāyugaḷalli nōvu ideyē?<br>Āḡāga<br>kelavom'me<br>viraḷavāḡi (aparūpakke)<br>endigū illa                                                                                                                                                                                                       | Do you have pain in your muscle?<br>Most of the time<br>Sometimes<br>Rarely<br>Not at all                                                                                                                        | How often do you feel pain in the muscles?<br>Often<br>Sometimes<br>Rarely<br>Never                                                                                                                          | Nim'ma snāyugaḷalli nōvu ideyē?<br>Āḡāga<br>kelavom'me<br>viraḷavāḡi (aparūpakke)<br>endigū illa                                                                                                                                                                                             |                                               | Nim'ma snāyu (mānsakhaṇḍa) gaḷalli nōvu ideyē?<br>Āḡāga<br>kelavom'me<br>viraḷavāḡi (aparūpakke)<br>endigū illa                                                                                                                                                                                                                                                                                        |
| 3      | When undertaking light physical activities (walking slowly, doing the ironing, dusting, washing-up, DIY, watering the garden, etc.), do you:<br>Have difficulty?<br>Get tired?<br>Experience pain?          | Nīvu laghuvāda daihika caṭuvaṭikegaḷannu māḍuvāga (nidhānavāḡi naḍeyuvudu, istriyannu māḍuvudu, dhūḷannu tegeyuvudu, snāna māḍuvudu, nimage iṣṭavāda kelasavannu māḍuvudu, giḍagaḷige nīru hākuvudu ityādi.) Ivugaḷalli nimage yāvāga<br>Kaṣṭavāḡuttade?<br>Sustāḡuttade? (Daṇivu)<br>nōvina anubhavavāḡuttade? | Sanṇa daihika caṭuvaṭikegaḷannu kaigoḷḷuvāga (nidhānavāḡi naḍeyuvudu, istri māḍuvudu, dhūḷu tegeyuvudu, toḷeyuvudu, tōṭakke nīru hākuvudu, ityādi) nimage:<br>Kaṣṭavāḡuttadeyē?<br>Sustāḡuvudē?<br>Nōvāḡuttadeyē?                                               | Nīvu laghuvāda daihika caṭuvaṭikegaḷannu māḍuvāga (nidhānavāḡi naḍeyuvudu, istriyannu māḍuvudu, dhūḷannu tegeyuvudu, snāna māḍuvudu, nimage iṣṭavāda kelasavannu māḍuvudu, giḍagaḷige nīru hākuvudu ityādi.) Ivugaḷalli nimage yāvāga<br>Kaṣṭavāḡuttade?<br>Sustāḡuttade?<br>Nōvina anubhavavāḡuttade? | When you involve yourself in the lighter activities (like slow walking, ironing clothes, dusting, bathing, doing your favourite activity, watering the plants etc.) Do you feel<br>Difficult?<br>Tired?<br>Pain? | Whenever you are involved in light physical activities, (a slow walk, Ironing, Taking bath, Watering the Garden, some other activity you like) when do you feel<br>Difficult to continue?<br>Tired?<br>Pain? | Nīvu hagaruvāda daihika caṭuvaṭikegaḷannu māḍuvāga (nidhānavāḡi naḍeyuvudu, istriyannu māḍuvudu, dhūḷannu tegeyuvudu, snāna māḍuvudu, nimage iṣṭavāda kelasavannu māḍuvudu, giḍagaḷige nīru hākuvudu ityādi.) Nimage yāvāga<br>Kaṣṭavāḡuttade?<br>Sustāḡuttade?<br>Nōvina anubhavavāḡuttade? |                                               | Nīvu hagaruvāda daihika caṭuvaṭikegaḷannu māḍuvāga (nidhānavāḡi naḍeyuvudu, istriyannu māḍuvudu, dhūḷannu tegeyuvudu, snāna māḍuvudu, nimage iṣṭavāda kelasavannu māḍuvudu, giḍagaḷige nīru hākuvudu ityādi.) Nimage yāvāga<br>Kaṣṭavāḡuttade?<br>Sustāḡuttade?<br>Nōvina anubhavavāḡuttade?                                                                                                           |

|   |                                                                                                                                                                                                                 |                                                                                                                                                                                                                                                                                      |                                                                                                                                                                                                                        |                                                                                                                                                                                                                                                                            |                                                                                                                                                                              |                                                                                                                                                                                                                                                              |                                                                                                                                                                                                                                                              |                                                                |                                                                                                                                                                                                                                                                                             |
|---|-----------------------------------------------------------------------------------------------------------------------------------------------------------------------------------------------------------------|--------------------------------------------------------------------------------------------------------------------------------------------------------------------------------------------------------------------------------------------------------------------------------------|------------------------------------------------------------------------------------------------------------------------------------------------------------------------------------------------------------------------|----------------------------------------------------------------------------------------------------------------------------------------------------------------------------------------------------------------------------------------------------------------------------|------------------------------------------------------------------------------------------------------------------------------------------------------------------------------|--------------------------------------------------------------------------------------------------------------------------------------------------------------------------------------------------------------------------------------------------------------|--------------------------------------------------------------------------------------------------------------------------------------------------------------------------------------------------------------------------------------------------------------|----------------------------------------------------------------|---------------------------------------------------------------------------------------------------------------------------------------------------------------------------------------------------------------------------------------------------------------------------------------------|
| 4 | When undertaking moderate physical activities (fast walking, cleaning windows, Hoovering, washing the car, pulling up weeds in the garden, etc.), do you:<br>Have difficulty?<br>Get tired?<br>Experience pain? | Nīvu madhyama caṭuvaṭikegaḷannu māḍuvāga [vēgavāgi naḍeyuvudu, kiṭikiḷaḷannu svacchagoḷisuvudu, vyākyūm klīniṅ māḍuvudu, kāraṇnu toḷeyuvudu, tōṭadallina kaḷeyannu tegeyuvudu (kiḷuvudu) ] ivuḷaḷalli nimage yāvāga Kaṣṭavāguttade? Sustāguttade? (Daṇivu) nōvina anubhavavāguttade? | Madhyama daihika caṭuvaṭikegaḷannu kaigoḷuvāga (vēgada naḍige, kiṭikiḷaḷannu svacchagoḷisuvudu, kāraṇnu toḷeyuvudu, tōṭadalli kaḷegaḷannu tegeyuvudu, ityādi) nimage: Kaṣṭavāguttadeyē? Sustāguvudē? Nōvāguttadeyē?    | Nīvu madhyama caṭuvaṭikegaḷannu māḍuvāga [vēgavāgi naḍeyuvudu, kiṭikiḷaḷannu svacchagoḷisuvudu, vyākyūm klīniṅ māḍuvudu, kāraṇnu toḷeyuvudu, tōṭadallina kaḷeyannu tegeyuvudu (kiḷuvudu)] ivuḷaḷalli nimage yāvāga Kaṣṭavāguttade? Sustāguttade? Nōvina anubhavavāguttade? | When you do a bit of heavy work such as brisk walk, cleaning windows, using vacuum cleaner, washing cars, weeding etc. Do you feel<br>It is difficult?<br>Tired?<br>Pain?    | Whenever you are involved in physical activities of average physical exertion, (such as walking briskly, cleaning windows, Vacuum cleaning, washing your car, removing weeds in the farm) when do you feel<br>Difficult to continue?<br>Tired?<br>Feel pain? | Nīvu kaṣṭakaravallada caṭuvaṭikegaḷannu māḍuvāga [vēgavāgi naḍeyuvudu, kiṭikiḷaḷannu svacchagoḷisuvudu, vyākyūm klīniṅ māḍuvudu, kāraṇnu toḷeyuvudu, tōṭadallina kaḷeyannu tegeyuvudu] nimage yāvāga Kaṣṭavāguttade? Sustāguttade? Nōvina anubhavavāguttade? | Kaṣṭakaravallada Vyākyūm klīniṅ māḍuvudu Tōṭadallina kaḷeyannu | Nīvu tumbā kaṣṭavallada caṭuvaṭikegaḷannu māḍuvāga [vēgavāgi naḍeyuvudu, kiṭikiḷaḷannu svacchagoḷisuvudu, guḍisuvudu, oresuvudu, kāraṇnu toḷeyuvudu, tōṭadallina hullu athavā bēḍavāda giḍagaḷannu tegeyuvudu ityādi] nimage yāvāga Kaṣṭavāguttade? Sustāguttade? Nōvina anubhavavāguttade? |
| 5 | When undertaking intense physical activities (running, hiking, lifting heavy objects, moving furniture, digging the garden, etc.), do you:<br>Have difficulty?<br>Get tired?<br>Experience pain?                | Nīvu tivravāda daihika caṭuvaṭikegaḷannu māḍuvāga (ōḍuvudu, tumbā dūra naḍeyuvudu, bhāravāda vastugaḷannu ettuvudu, pīṭhōpakaraṇagaḷannu calisuvudu, tōṭagaḷannu ageyuvudu ityādi) ivuḷaḷalli nimage yāvāga Kaṣṭavāguttade? Sustāguttade? (Daṇivu) nōvina anubhavavāguttade?         | Tivravāda daihika caṭuvaṭikegaḷannu kaigoḷuvāga ( tirugāḍuvudu, bhāravāda vastugaḷannu ettuvudu, pīṭhōpakaraṇagaḷannu sarisuvudu, udyānavannu ageyuvudu, ityādi) nimage: Kaṣṭavāguttadeyē? Sustāguvudē? Nōvāguttadeyē? | Nīvu tivravāda daihika caṭuvaṭikegaḷannu māḍuvāga (ōḍuvudu, tumbā dūra naḍeyuvudu, bhāravāda vastugaḷannu ettuvudu, pīṭhōpakaraṇagaḷannu sarisuvudu, tōṭagaḷannu ageyuvudu ityādi) ivuḷaḷalli nimage yāvāga Kaṣṭavāguttade? Sustāguttade? Nōvina anubhavavāguttade?        | When you are involved in tougher activities like running, long walk, lifting heavy things, moving furniture, digging etc. Do you feel<br>It is difficult?<br>Tired?<br>Pain? | Whenever you are involved in hard physical activities, (Running, Walking a long distance, Lifting heavy objects, Digging in the farm, moving the furniture) when do you feel<br>Difficult to continue?<br>Tired?<br>Feel pain?                               | Nīvu tivravāda daihika caṭuvaṭikegaḷannu māḍuvāga (ōḍuvudu, tumbā dūra naḍeyuvudu, bhāravāda vastugaḷannu ettuvudu, pīṭhōpakaraṇagaḷannu sarisuvudu, tōṭagaḷannu ageyuvudu ityādi) nimage yāvāga Kaṣṭavāguttade? Sustāguttade? Nōvina anubhavavāguttade?     |                                                                | Nīvu tivravāda daihika caṭuvaṭikegaḷannu māḍuvāga (ōḍuvudu, tumbā dūra naḍeyuvudu, bhāravāda vastugaḷannu ettuvudu, pīṭhōpakaraṇagaḷannu sarisuvudu, tōṭagaḷannu ageyuvudu ityādi) nimage yāvāga Kaṣṭavāguttade? Sustāguttade? Nōvina anubhavavāguttade?                                    |
| 6 | Do you currently feel old?<br>Yes, very<br>Yes, somewhat<br>Yes, a little<br>No, not at all                                                                                                                     | Nīvu nim'mannu vṛd'dha athavā vṛd'dhe endu bhāvisuvirā?<br>Haudu, tumbā haudu, svalpamattige haudu, svalpa illa, illavē illa                                                                                                                                                         | Nimage prastuta vayas'sāguttide endu anisuttideyē?<br>Haudu, tumbā haudu, svalpamattige haudu, svalpa illa, illavē illa                                                                                                | Prastuta nimage vayas'sāguttide endu bhāvisuvirā?<br>Haudu, tumbā haudu, svalpamattige haudu, svalpa illa, illavē illa                                                                                                                                                     | Do you feel that you are getting old?<br>Yes, too often<br>Yes, sometimes<br>Yes, a little<br>No, not at all                                                                 | Do you think that you are getting aged now?<br>Yes, very much<br>Yes, to some extent<br>Yes, a little<br>No, Never                                                                                                                                           | Prastuta nimage vayas'sāguttide endu bhāvisuvirā?<br>Haudu, tumbā haudu, svalpamattige haudu, svalpa illa, illavē illa                                                                                                                                       | Prastuta                                                       | Īga nimage vayas'sāguttide endu bhāvisuvirā?<br>Haudu, tumbā haudu, svalpamattige haudu, svalpa illa, illavē illa                                                                                                                                                                           |
| 7 | If yes to question 6, what gives you that impression?                                                                                                                                                           | Āraṇē saṅkhyeya praśnege uttara"haudu" endādare, nimage hāge ēke                                                                                                                                                                                                                     | 6 Nē praśnege haudu endādare, nimage ēke hāge anisitu? (Nimage                                                                                                                                                         | 6 Nē praśnege uttara"haudu" endādare, nimage hāge ēke anisuttide? (Ī keḷagina                                                                                                                                                                                              | If your reply is yes for Q6. Why do you feel so?                                                                                                                             | If your answer for the sixth question is 'yes',                                                                                                                                                                                                              | 6 Nē praśnege uttara"haudu" endādare, nimage hāge ēke                                                                                                                                                                                                        |                                                                | 6 Nē praśnege uttara"haudu" endādare, nimage hāge ēke anisuttide? (Nīvu iṣṭapaḍuvaṣṭu                                                                                                                                                                                                       |

|   |                                                                                                                                                                                                                                                                                                            |                                                                                                                                                                                                                                                                                                                                                                                                                                                                                                    |                                                                                                                                                                                                                                                                                                                     |                                                                                                                                                                                                                                                                                                                                                                                                                                                |                                                                                                                                                                                                                                                                                 |                                                                                                                                                                                                                                                                                                                                                 |                                                                                                                                                                                                                                                                                                                                                                                                           |                                         |                                                                                                                                                                                                                                                                                                                                                                           |
|---|------------------------------------------------------------------------------------------------------------------------------------------------------------------------------------------------------------------------------------------------------------------------------------------------------------|----------------------------------------------------------------------------------------------------------------------------------------------------------------------------------------------------------------------------------------------------------------------------------------------------------------------------------------------------------------------------------------------------------------------------------------------------------------------------------------------------|---------------------------------------------------------------------------------------------------------------------------------------------------------------------------------------------------------------------------------------------------------------------------------------------------------------------|------------------------------------------------------------------------------------------------------------------------------------------------------------------------------------------------------------------------------------------------------------------------------------------------------------------------------------------------------------------------------------------------------------------------------------------------|---------------------------------------------------------------------------------------------------------------------------------------------------------------------------------------------------------------------------------------------------------------------------------|-------------------------------------------------------------------------------------------------------------------------------------------------------------------------------------------------------------------------------------------------------------------------------------------------------------------------------------------------|-----------------------------------------------------------------------------------------------------------------------------------------------------------------------------------------------------------------------------------------------------------------------------------------------------------------------------------------------------------------------------------------------------------|-----------------------------------------|---------------------------------------------------------------------------------------------------------------------------------------------------------------------------------------------------------------------------------------------------------------------------------------------------------------------------------------------------------------------------|
|   | (Choose as many answers as you like)<br>I become unwell easily<br>I take many medications<br>I feel a weakness in my muscles<br>I have problems with my memory<br>I've had to face the death of several people close to me<br>I do not have much energy, I am often tired<br>My eyesight is poor<br>Other: | anisuttide? (Ī keḷagina āykegaḷalli nimage iṣṭavāda ondakkinta heccina āykegaḷannu āydakoḷli)<br>Nānu sulabhavāgi anārōgyakke tuttāguttēne nānu anēka auṣadhagaḷannu tegedukoḷlutēne.<br>Nānu snāyugaḷalli daurbalyavannu anubhavisuttiddēne.<br>Nānu marevina samasyeyannu hondiddēne.<br>Nanna hattiradavara halavāru janara sāvannu nānu edurisiruttēne nānu edurisiruttēne nānu āgāge śaktihīnanāgiruttēne, nanage āgāga sustāguttade.<br>Nānu kaḍime kaṇṇina dṛṣṭiyannu hondiddēne.<br>Itare. | bēkāda uttaragaḷannu āykemādi)<br>Nānu sulabhavāgi asvasthanāguttēne nānu anēka auṣadhagaḷannu tegedukoḷlutēne nānu snāyugaḷalli daurbalyavannu anubhavisuttēne nanage nenapina nanna hattiraviruva halavāru janara sāvannu nānu edurisabēkāyitu nanage heccu śakti illa, nānu āgāge daṇididdēne kaḷape dṛṣṭi itare | āykegaḷalli nimage iṣṭavāda ondakkinta heccina āykegaḷannu āydukoḷlabahudu)<br>Nānu sulabhavāgi anārōgyakke tuttāguttēne nānu anēka auṣadhagaḷannu tegedukoḷlutēne.<br>Nānu snāyugaḷalli daurbalyavannu anubhavisuttiddēne.<br>Nānu marevina samasyeyannu hondiddēne.<br>Nanna hattirada halavāru janara sāvannu nānu edurisiruttēne.<br>Nānu śaktihīnanāgiruttēne, nanage āgāga sustāguttade.<br>Nānu kaḷape dṛṣṭiyannu hondiddēne.<br>Itare. | (Choose one or more than one from the options given below)<br>I feel sick easily<br>I am taking a lot of medicine<br>I feel weakness in the muscles<br>I have memory issues<br>I have lost my near dear ones<br>I am weak and get tired often<br>I have poor eyesight<br>Others | why do you think so? (You can choose more than one of the following options if you prefer to)<br>I Fall sick very often<br>I take too much medication<br>I feel my muscles are weak<br>I forget things very easily<br>I have confronted with deaths of closer ones<br>I feel week; get tired very easily<br>I have poor vision<br>Other reasons | anisuttide? (Nīvu iṣṭapaḍuvaṣṭu uttaragaḷannu āydukoḷlabahudu)<br>Nānu sulabhavāgi anārōgyakke tuttāguttēne nānu anēka auṣadhagaḷannu tegedukoḷlutēne.<br>Nanna snāyugaḷu daurbalyavāgive endu bhāvisuttēne nānu marevina samasyeyannu hondiddēne.<br>Nanna hattiradavara halavāru janara sāvannu nōḍiddēne nanage heccu śakti illa, nanage āgāga sustāguttade.<br>Nanna kaṇṇina dṛṣṭi mandavāgide itare. |                                         | uttaragaḷannu āydukoḷlabahudu)<br>Nānu sulabhavāgi anārōgyakke tuttāguttēne nānu anēka auṣadhagaḷannu tegedukoḷlutēne.<br>Nanna snāyugaḷu daurbalyavāgive endu bhāvisuttēne nānu marevina samasyeyannu hondiddēne.<br>Nanna hattiradavara halavāru janara sāvannu nōḍiddēne nanage heccu śakti illa, nanage āgāga sustāguttade.<br>Nanna kaṇṇina dṛṣṭi mandavāgide itare. |
| 8 | Do you feel physically weak?<br>Yes, completely<br>Yes, somewhat<br>Yes, a little<br>No, not at all                                                                                                                                                                                                        | Nīvu daihikavāgi daurbalyavannu anubhavisuttiddīrā?<br>Haudu, sampūrṇavāgi haudu, svalpamaṭṭige haudu, svalpa illa, illavē illa                                                                                                                                                                                                                                                                                                                                                                    | Nīvu daihikavāgi durbalarāgiddīrā?<br>Haudu, sampūrṇavāgi haudu, svalpamaṭṭige haudu, svalpa illa, illavē illa                                                                                                                                                                                                      | Nīvu daihikavāgi daurbalyavannu anubhavisuttiddīrā?<br>Haudu, sampūrṇavāgi haudu, svalpamaṭṭige haudu, svalpa illa, illavē illa                                                                                                                                                                                                                                                                                                                | Do you feel physically weak?<br>Most of the time<br>Sometimes<br>Rarely<br>Not at all                                                                                                                                                                                           | Do you experience physical weakness?<br>Yes, completely<br>Yes, to some extent<br>Yes, a little<br>No, Never.                                                                                                                                                                                                                                   | Nīvu daihikavāgi durbalarāgiddīrā?<br>Haudu, sampūrṇavāgi haudu, svalpamaṭṭige haudu, svalpa illa, illavē illa                                                                                                                                                                                                                                                                                            |                                         | Nīvu daihikavāgi durbalarāgiddīrā?<br>Haudu, sampūrṇavāgi haudu, svalpamaṭṭige haudu, svalpa illa, illavē illa                                                                                                                                                                                                                                                            |
| 9 | Do you feel you are limited in:<br>The length of time you can walk for?<br>How often you go out walking?<br>The distance you can walk?<br>The speed at which you can walk?<br>The length of your steps?                                                                                                    | Ivugaḷalli nīvu sīmitarendu bhāvisuttīrā?<br>Nīvu ondu nigadita samayakkinta heccu naḍeyalu sādhyavāgadīrūvudu nīvu eṣṭu bāri vāking ge hōgaballiri?<br>Nīvu eṣṭu dūra naḍeyaballiri?<br>Nīvu eṣṭu vēgavāgi naḍeyaballiri?<br>Nīvu eṣṭu dūra hejje iṭṭu naḍeyaballiri?                                                                                                                                                                                                                             | Nīvu Ī keḷaginavugaḷige sīmitavāgiruttīri endu bhāvisuttīrā?<br>Nīvu eṣṭu samayadavarege naḍeyabahudu?<br>Nīvu eṣṭu bāri naḍedukoṇḍu hōguttīri?<br>Nīvu naḍeyabahudā dūra?<br>Nīvu naḍeyuva vēga?<br>Nim'ma hejjeḷa udda?                                                                                           | Ivugaḷalli nīvu sīmitarendu bhāvisuttīrā?<br>Nīvu eṣṭu samaya naḍeyaballiri?<br>Nīvu eṣṭu bāri naḍedukoṇḍu hōgaballiri?<br>Nīvu eṣṭu dūra naḍeyaballiri?<br>Nīvu eṣṭu vēgavāgi naḍeyaballiri?<br>Nīvu eṣṭu dūra hejje iṭṭu naḍeyaballiri?                                                                                                                                                                                                      | What do you think about the following activities?<br>How long can you walk?<br>How many times can you walk?<br>How far can you walk?<br>How fast can you walk?<br>How much distance can you                                                                                     | Do you think you are limited in the following activities?<br>How long (time) can you walk?<br>How many times can you walk?<br>How far can you walk?<br>How fast can you walk?<br>How much distance can you                                                                                                                                      | Ī keḷagina caṭuvaṭikegaḷalli, Nīvu eṣṭu samaya naḍeyaballiri?<br>Nīvu eṣṭu bāri naḍedukoṇḍu hōgaballiri?<br>Nīvu eṣṭu dūra naḍeyaballiri?<br>Nīvu eṣṭu vēgavāgi naḍeyaballiri?<br>Nīvu eṣṭu dūra hejje iṭṭu (hejjeḷa naḍuvina antara) naḍeyaballiri?                                                                                                                                                      | Nīvu eṣṭu bāri naḍedukoṇḍu hōgaballiri? | Ī keḷagina yāva caṭuvaṭike kaḍimeyāgide (sīmita) endu bhāvisuttīri:<br>Nīvu eṣṭu samaya naḍeyaballiri?<br>Nīvu eṣṭu bāri naḍedukoṇḍu hōgaballiri?<br>Nīvu eṣṭu dūra naḍeyaballiri?<br>Nīvu eṣṭu vēgavāgi naḍeyaballiri?<br>Nīvu eṣṭu dūra hejje iṭṭu (hejjeḷa naḍuvina antara) naḍeyaballiri?                                                                             |

|           |                                                                                                                                                                                                              |                                                                                                                                                                                                                                                                                                        |                                                                                                                                                                                                                  |                                                                                                                                                                                                                                                                 |                                                                                                                                                                                        |                                                                                                                                                                                                                                             |                                                                                                                                                                                                                                                                 |                  |                                                                                                                                                                                                                                                                 |
|-----------|--------------------------------------------------------------------------------------------------------------------------------------------------------------------------------------------------------------|--------------------------------------------------------------------------------------------------------------------------------------------------------------------------------------------------------------------------------------------------------------------------------------------------------|------------------------------------------------------------------------------------------------------------------------------------------------------------------------------------------------------------------|-----------------------------------------------------------------------------------------------------------------------------------------------------------------------------------------------------------------------------------------------------------------|----------------------------------------------------------------------------------------------------------------------------------------------------------------------------------------|---------------------------------------------------------------------------------------------------------------------------------------------------------------------------------------------------------------------------------------------|-----------------------------------------------------------------------------------------------------------------------------------------------------------------------------------------------------------------------------------------------------------------|------------------|-----------------------------------------------------------------------------------------------------------------------------------------------------------------------------------------------------------------------------------------------------------------|
|           |                                                                                                                                                                                                              |                                                                                                                                                                                                                                                                                                        |                                                                                                                                                                                                                  |                                                                                                                                                                                                                                                                 | keep between steps?                                                                                                                                                                    | keep between steps?                                                                                                                                                                                                                         |                                                                                                                                                                                                                                                                 |                  |                                                                                                                                                                                                                                                                 |
| <b>10</b> | When you are walking:<br>Do you feel very tired?<br>Do you need to sit down regularly to recover?<br>Do you have difficulty crossing roads quickly enough?<br>Do you have difficulties with uneven surfaces? | Nīvu naḍeyuvāga (vākiṅ māḍuvāga):<br>Nimage tumbā sustu (daṇivu)<br>anubhavavāguttadeyē?<br>Cētarisikoḷḷalu nīvu niyamitavāgi kulitukoḷḷabēkāgattadeyē?<br>Nīvu rastegaḷannu vēgavāgi dāṭalu kaṣṭapaḍuttirā?<br>Nīvu asama mēlmaigaḷalli (samataṭṭallada jāgadalli) naḍeyalu tondareyannu hondiruvirā? | Nīvu naḍeyuvāga<br>Nimage tumbā āyāsavāguttadeye?<br>Cētarisikoḷḷalu nīvu āgāga kulitukoḷḷabēkē?<br>Nimage rastegaḷannu tvaritavāgi dāṭalu kaṣṭavideyē?<br>Asama mēlmaigaḷondige nīvu tondaregaḷannu hondiddirā? | Nīvu naḍeyuvāga (vākiṅ māḍuvāga):<br>Nimage tumbā āyāsada anubhavavāguttadeyē?<br>Cētarisikoḷḷalu nīvu āgāga kulitukoḷḷabēkāgattadeyē?<br>Nīvu rastegaḷannu vēgavāgi dāṭalu kaṣṭapaḍuttirā?<br>Nīvu samataṭṭallada jāgadalli naḍeyalu tondareyannu hondiruvirā? | While walking:<br>Do you feel tired?<br>Do you sit in between to feel comfortable?<br>Do you find it difficult to cross the road quickly?<br>It is difficult to walk on plain surface? | When you walk/<br>go on walking:<br>Do you feel tired?<br>Do you need to sit for some time while working in order to regain stamina?<br>Do you find it hard to cross the road very fast?<br>Do you have trouble in walking on uneven space? | Nīvu naḍeyuvāga (vākiṅ māḍuvāga):<br>Nimage tumbā āyāsada anubhavavāguttadeyē?<br>Cētarisikoḷḷalu nīvu āgāga kulitukoḷḷabēkāgattadeyē?<br>Nīvu rastegaḷannu vēgavāgi dāṭalu kaṣṭapaḍuttirā?<br>Nīvu samataṭṭallada jāgadalli naḍeyalu tondareyannu hondiruvirā? |                  | Nīvu naḍeyuvāga (vākiṅ māḍuvāga):<br>Nimage tumbā āyāsada anubhavavāguttadeyē?<br>Cētarisikoḷḷalu nīvu āgāga kulitukoḷḷabēkāgattadeyē?<br>Nīvu rastegaḷannu vēgavāgi dāṭalu kaṣṭapaḍuttirā?<br>Nīvu samataṭṭallada jāgadalli naḍeyalu tondareyannu hondiruvirā? |
| <b>11</b> | Do you have problems with your balance?<br>Often<br>Occasionally<br>Rarely<br>Never                                                                                                                          | Nim'ma samatōlanadalli samasyeyannu hondiruvirā?<br>Āgāga om'mom'me aparūpakke endigū illa                                                                                                                                                                                                             | Nim'ma samatōlanadalli nimage samasye ideyē?<br>Āgāga kelavom'me virāḷavāgi endigū                                                                                                                               | Nim'ma samatōlanadalli samasyeyannu hondiruvirā?<br>Āgāga om'mom'me aparūpakke endigū illa                                                                                                                                                                      | Do you have problem in maintaining stability?<br>Most of the time<br>Sometimes<br>Rarely<br>Not at all                                                                                 | Do you feel that that you lose your balance ?<br>Often<br>Sometimes<br>Rarely<br>Never                                                                                                                                                      | Nim'ma samatōlanadalli samasyeyannu hondiruvirā?<br>Āgāga om'mom'me aparūpakke endigū illa                                                                                                                                                                      | Samatōlana dalli | Nim'ma samatōlanadalli (byālens – nēravāgi nilluvāga athavā naḍeyuvāga om'mege bīḷuvante āguttadeyē?)<br>Samasyeyannu hondiruvirā?<br>Āgāga om'mom'me aparūpakke endigū illa                                                                                    |
| <b>12</b> | How often do you fall?<br>Very often<br>Occasionally<br>Rarely<br>Never                                                                                                                                      | Nīvu eṣṭu bāri biddidiri?<br>Bahaḷaṣṭu sala om'mom'me aparūpakke endigū illa                                                                                                                                                                                                                           | Nīvu eṣṭu bāri bīḷuttiri?<br>Āgāgge kelavom'me virāḷavāgi endigū                                                                                                                                                 | Nīvu eṣṭu bāri bīḷuttiri?<br>Bahaḷaṣṭu sala om'mom'me aparūpakke endigū illa                                                                                                                                                                                    | How many times do you stumble?<br>Most of the time<br>Sometimes<br>Rarely<br>Not at all                                                                                                | How many times do you fall losing your balance?<br>Many times<br>Sometimes<br>Rarely<br>Never                                                                                                                                               | Nīvu eṣṭu bāri bīḷuttiri?<br>Bahaḷaṣṭu sala om'mom'me aparūpakke endigū illa                                                                                                                                                                                    |                  | Nīvu eṣṭu bāri bīḷuttiri?<br>Bahaḷaṣṭu sala om'mom'me aparūpakke endigū illa                                                                                                                                                                                    |
| <b>13</b> | Do you think that your physical appearance has changed?<br>Yes, very<br>Yes, somewhat<br>Yes, a little<br>No, not at all                                                                                     | Nīvu nim'ma daihika rūpadalli badalāvaṇeyāgide endu bhāvisuttirā?<br>Haudu, tumbā haudu, svalpamaṭṭige haudu, svalpamaṭṭige haudu, svalpa illa. Illavē illa                                                                                                                                            | Nim'ma daihika nōṭa badalāgide endu nīvu bhāvisuttirā?<br>Haudu, tumbā haudu, svalpamaṭṭige haudu svalpa illa, illavē illa                                                                                       | Nīvu nim'ma daihika rūpadalli badalāvaṇeyāgide endu bhāvisuttirā?<br>Haudu, tumbā haudu, svalpamaṭṭige haudu, svalpa illa. Illavē illa                                                                                                                          | Do you feel there is change in your physical appearance?<br>Yes, a lot<br>Yes, to some extent<br>Yes, a little<br>No, not at all                                                       | Do you think that there is a change in the physical structure of your body?<br>Yes, to a great extent<br>Yes, to some extent<br>Yes, a little<br>No, Never                                                                                  | Nīvu nim'ma dēhada ākārādalli badalāvaṇeyāgide endu bhāvisuttirā?<br>Haudu, tumbā haudu, svalpamaṭṭige haudu, svalpa illa. Illavē illa                                                                                                                          |                  | Nīvu nim'ma dēhada ākārādalli badalāvaṇeyāgide endu bhāvisuttirā?<br>Haudu, tumbā haudu, svalpamaṭṭige haudu, svalpa illa. Illavē illa                                                                                                                          |

|    |                                                                                                                                                                                                                                                                                             |                                                                                                                                                                                                                                                                                                                                                                                                                                                      |                                                                                                                                                                                                                                                                                                                         |                                                                                                                                                                                                                                                                                                                                                                                                                            |                                                                                                                                                                                                                                                                  |                                                                                                                                                                                                                                                                                                                                                                              |                                                                                                                                                                                                                                                                                                                                                                 |                    |                                                                                                                                                                                                                                                                                                                                                                  |
|----|---------------------------------------------------------------------------------------------------------------------------------------------------------------------------------------------------------------------------------------------------------------------------------------------|------------------------------------------------------------------------------------------------------------------------------------------------------------------------------------------------------------------------------------------------------------------------------------------------------------------------------------------------------------------------------------------------------------------------------------------------------|-------------------------------------------------------------------------------------------------------------------------------------------------------------------------------------------------------------------------------------------------------------------------------------------------------------------------|----------------------------------------------------------------------------------------------------------------------------------------------------------------------------------------------------------------------------------------------------------------------------------------------------------------------------------------------------------------------------------------------------------------------------|------------------------------------------------------------------------------------------------------------------------------------------------------------------------------------------------------------------------------------------------------------------|------------------------------------------------------------------------------------------------------------------------------------------------------------------------------------------------------------------------------------------------------------------------------------------------------------------------------------------------------------------------------|-----------------------------------------------------------------------------------------------------------------------------------------------------------------------------------------------------------------------------------------------------------------------------------------------------------------------------------------------------------------|--------------------|------------------------------------------------------------------------------------------------------------------------------------------------------------------------------------------------------------------------------------------------------------------------------------------------------------------------------------------------------------------|
| 14 | <p>If yes to question 13, in what way? (Choose as many answers as you like)<br/> Change in your weight (you've put on weight or you've lost weight)<br/> Appearance of wrinkles<br/> Loss of height<br/> Loss of muscle mass<br/> Hair loss<br/> Getting white or grey hair<br/> Other:</p> | <p>Hadimūranē (13 nē) sañkhyeya praśnege uttara"haudu" endādare, adu yāva rītiyalli? (Ī keḷaḡinavugaḷalli ondakkinta heccu āykegaḷannu āydukoḷḷabahudu) Nim'ma tūkadalina badalāvaṇe(nīvu tūkavannu heccisiddīri/ nīvu tūkavannu kaḷedakoṇḍiddīri) nim'ma carmada sukkugaṭṭavike ettara naṣṭavāḡide snāyu (mānsa khaṇḍa) vina balavannu kaḷedukoṇḍiddēne. Kūḍalu uduruvikeyannu hondiddēne. Bīḷi athavā būdu baṇṇada kūḍalannu hondiddēne itare.</p> | <p>13Nē praśnege haudādare, yāva rītiyalli? (Nimage bekāda uttaragaḷannu āykeḡaḷi) Nim'ma tūkadalina badalāvaṇe (nīvu tūkavannu heccisiddīri/ nīvu tūkavannu kaḷedukoṇḍiddīri) sukku gōcarisuvudu</p> <p>ettarada naṣṭa</p> <p>snāyuśakti</p> <p>kūḍalu uduruvike</p> <p>bīḷi athavā būdu kūḍalu gōcarisuvudu itare</p> | <p>13 Nē praśnege uttara"haudu" endādare, adu yāva rītiyalli? (Ī keḷaḡinavugaḷalli ondakkinta heccu āykegaḷannu āydukoḷḷabahudu) Nim'ma tūkadalina badalāvaṇe(nīvu tūkavannu heccisiddīri/ nīvu tūkavannu kaḷedakoṇḍiddīri) nim'ma carmada sukkugaṭṭavike ettara naṣṭavāḡide snāyu (mānsakhaṇḍa) vina balavannu kaḷedukoṇḍiddēne kūḍalu uduruvikeyannu hondiddēne bīḷi athavā būdu baṇṇada kūḍalannu hondiddēne itare.</p> | <p>If your answer is yes to question 13, In what way do you feel there is a change<br/> Difference in your body weight<br/> Wrinkles on your skin<br/> Have you shrunk<br/> Loss of muscle strength<br/> Have hair fall<br/> Have gray/white hair<br/> Other</p> | <p>If your answer to the 13th question is 'yes', in what way the change has happened?<br/> (You can choose more than one of the following options )<br/> Change in your weight(You have gained/ lost weight)<br/> Wrinkles on the skin<br/> Lost height<br/> Feel that muscles have lost power<br/> Loss of hair<br/> Developed White or grey hair<br/> Any other change</p> | <p>13 Nē praśnege uttara"haudu" endādare, adu yāva rītiyalli? (Ī keḷaḡinavugaḷalli nim'ma āykegaḷannu āydukoḷḷabahudu) Nim'ma tūkadalina badalāvaṇe(nīvu tūkavannu heccisiddīri/ nīvu tūkavannu kaḷedakoṇḍiddīri) nim'ma carmada sukkugaṭṭavike ettara kaḷimeyāḡide mānsakhaṇḍagaḷu (snāyugaḷu) kṣṇisuttive. Kūḍalu uduruṭṭide kūḍalu bīḷiyāḡuttide. Itare.</p> |                    | <p>13 Nē praśnege uttara"haudu" endādare, adu yāva rītiyalli? (Ī keḷaḡinavugaḷalli nim'ma āykegaḷannu āydukoḷḷabahudu) Nim'ma tūkadalina badalāvaṇe (nīvu tūkavannu heccisiddīri/ nīvu tūkavannu kaḷedakoṇḍiddīri) nim'ma carmada sukkugaṭṭavike ettara kaḷimeyāḡide snāyugaḷu (mānsakhaṇḍagaḷu) kṣṇisuttive. Kūḍalu uduruṭṭide kūḍalu bīḷiyāḡuttide. Itare.</p> |
| 15 | <p>If yes to question 13, are you upset by this change?<br/> Yes, very<br/> Yes, somewhat<br/> Yes, a little<br/> No, not at all</p>                                                                                                                                                        | <p>Hadimūranē (13 nē) sañkhyeya praśnege uttara"haudu" endādare, idarinda nīvu asamādhāḡaṇḍiddīrā? Haudu, tumbā haudu, svalpamaṭṭiḡe haudu, svalpa illa. Illavē illa</p>                                                                                                                                                                                                                                                                             | <p>13Nē praśnege haudādare, ī badalāvaṇeyinda nīvu asamādhāḡaṇḍiddīrā? Haudu, tumbā haudu, svalpamaṭṭiḡe haudu svalpa illa, illavē illa</p>                                                                                                                                                                             | <p>13 Nē praśnege uttara"haudu" endādare, ī badalāvaṇeyinda asamādhāḡaṇḍiddīrā? Haudu, tumbā haudu, svalpamaṭṭiḡe haudu, svalpa illa. Illavē illa</p>                                                                                                                                                                                                                                                                      | <p>If your answer is yes for question 13 are you distressed with this change?<br/> Yes, a lot<br/> Yes, to some extent<br/> Yes, a little<br/> No, not at all</p>                                                                                                | <p>If your answer to the 13th question is 'yes', are you disappointed with the change?<br/> Yes, to a great extent<br/> Yes, to some extent<br/> Yes, a little<br/> No, Never</p>                                                                                                                                                                                            | <p>13 Nē praśnege uttara"haudu" endādare, nīvu ī badalāvaṇeyinda asamādhāḡaṇḍiddīrā? Haudu, tumbā haudu, svalpamaṭṭiḡe haudu, svalpa illa. Illavē illa</p>                                                                                                                                                                                                      | Asamādhāḡaṇḍiddīrā | <p>13 Nē praśnege uttara"haudu" endādare, nīvu ī badalāvaṇeyinda cintitaḡiddīrā? Haudu, tumbā haudu, svalpamaṭṭiḡe haudu, svalpa illa. Illavē illa</p>                                                                                                                                                                                                           |
| 16 | <p>Do you feel frail?<br/> Very much so<br/> A little<br/> Not at all</p>                                                                                                                                                                                                                   | <p>Nīvu durbalarāḡiddīri endu bhāvisuttīrā? Tumbā anisuttide. Svalpa illavē illa</p>                                                                                                                                                                                                                                                                                                                                                                 | <p>Nīvu durbalarāḡiddīrā? Khaṇḍitavāḡi haudu svalpa illavē illa</p>                                                                                                                                                                                                                                                     | <p>Nīvu durbalarāḡiddīri endu bhāvisuttīrā? Khaṇḍitavāḡi haudu svalpa illavē illa</p>                                                                                                                                                                                                                                                                                                                                      | <p>Do you think you have become weak?<br/> Yes, ofcourse<br/> Yes, a little<br/> No, not at all</p>                                                                                                                                                              | <p>Do you think that you have become weak?<br/> Yes, Certainly<br/> To some extent<br/> No, never</p>                                                                                                                                                                                                                                                                        | <p>Nīvu durbalarāḡiddīri endu bhāvisuttīrā? Khaṇḍitavāḡi haudu svalpa illavē illa</p>                                                                                                                                                                                                                                                                           |                    | <p>Nīvu durbalarāḡiddīri endu bhāvisuttīrā? Khaṇḍitavāḡi haudu svalpa illavē illa</p>                                                                                                                                                                                                                                                                            |
| 17 | <p>Do you currently have difficulty in undertaking any of the following daily activities:</p>                                                                                                                                                                                               | <p>Nimage ḡa ī keḷaḡiruva yāva caṭuvatiḡegaḷannu māḡalu kaṣṭa anisuttade? Ondu mahaḡiya meṭṭilannu hattuvudu</p>                                                                                                                                                                                                                                                                                                                                     | <p>Prastuta, ī keḷaḡina yāvudē dainandina caṭuvatiḡegaḷannu kaḡiḡoḷḷalu nimage tondare ideyē?</p>                                                                                                                                                                                                                       | <p>Nimage ḡa ī keḷaḡina yāva dainandina caṭuvatiḡegaḷannu māḡalu kaṣṭa anisuttade?</p>                                                                                                                                                                                                                                                                                                                                     | <p>Which of the following activities are difficult for you?</p>                                                                                                                                                                                                  | <p>Do you find it difficult to carry out any of the following activities?</p>                                                                                                                                                                                                                                                                                                | <p>Nimage ḡa ī keḷaḡina yāva dainandina caṭuvatiḡegaḷannu māḡalu kaṣṭa anisuttade?</p>                                                                                                                                                                                                                                                                          | Ettariruva         | <p>Nimage ḡa ī keḷaḡina yāva dainandina caṭuvatiḡegaḷannu māḡalu kaṣṭa anisuttade? Ondu mahaḡiya meṭṭilannu hattuvudu</p>                                                                                                                                                                                                                                        |

|  |                                                                                                                                                                                                                                                                                                                                                                                                                                                                                                                                                                                                                                                                                                                                                       |                                                                                                                                                                                                                                                                                                                                                                                                                                                                                                                                                                                                                                                                                                                                                                                              |                                                                                                                                                                                                                                                                                                                                                                                                                                                                                                                                                                                                                                                                                                                                                                                                           |                                                                                                                                                                                                                                                                                                                                                                                                                                                                                                                                                                                                                                                                                                                                                                                                                                                               |                                                                                                                                                                                                                                                                                                                                                                                                                                                                                                                                                                                                           |                                                                                                                                                                                                                                                                                                                                                                                                                                                                                                                                                                                                                                                                                 |                                                                                                                                                                                                                                                                                                                                                                                                                                                                                                                                                                                                                                                                                                                                                                                                                                                                |  |                                                                                                                                                                                                                                                                                                                                                                                                                                                                                                                                                                                                                                                                                                                                                                                                                                             |
|--|-------------------------------------------------------------------------------------------------------------------------------------------------------------------------------------------------------------------------------------------------------------------------------------------------------------------------------------------------------------------------------------------------------------------------------------------------------------------------------------------------------------------------------------------------------------------------------------------------------------------------------------------------------------------------------------------------------------------------------------------------------|----------------------------------------------------------------------------------------------------------------------------------------------------------------------------------------------------------------------------------------------------------------------------------------------------------------------------------------------------------------------------------------------------------------------------------------------------------------------------------------------------------------------------------------------------------------------------------------------------------------------------------------------------------------------------------------------------------------------------------------------------------------------------------------------|-----------------------------------------------------------------------------------------------------------------------------------------------------------------------------------------------------------------------------------------------------------------------------------------------------------------------------------------------------------------------------------------------------------------------------------------------------------------------------------------------------------------------------------------------------------------------------------------------------------------------------------------------------------------------------------------------------------------------------------------------------------------------------------------------------------|---------------------------------------------------------------------------------------------------------------------------------------------------------------------------------------------------------------------------------------------------------------------------------------------------------------------------------------------------------------------------------------------------------------------------------------------------------------------------------------------------------------------------------------------------------------------------------------------------------------------------------------------------------------------------------------------------------------------------------------------------------------------------------------------------------------------------------------------------------------|-----------------------------------------------------------------------------------------------------------------------------------------------------------------------------------------------------------------------------------------------------------------------------------------------------------------------------------------------------------------------------------------------------------------------------------------------------------------------------------------------------------------------------------------------------------------------------------------------------------|---------------------------------------------------------------------------------------------------------------------------------------------------------------------------------------------------------------------------------------------------------------------------------------------------------------------------------------------------------------------------------------------------------------------------------------------------------------------------------------------------------------------------------------------------------------------------------------------------------------------------------------------------------------------------------|----------------------------------------------------------------------------------------------------------------------------------------------------------------------------------------------------------------------------------------------------------------------------------------------------------------------------------------------------------------------------------------------------------------------------------------------------------------------------------------------------------------------------------------------------------------------------------------------------------------------------------------------------------------------------------------------------------------------------------------------------------------------------------------------------------------------------------------------------------------|--|---------------------------------------------------------------------------------------------------------------------------------------------------------------------------------------------------------------------------------------------------------------------------------------------------------------------------------------------------------------------------------------------------------------------------------------------------------------------------------------------------------------------------------------------------------------------------------------------------------------------------------------------------------------------------------------------------------------------------------------------------------------------------------------------------------------------------------------------|
|  | <p>Climbing a flight of stairs?<br/>Climbing several flights of stairs?<br/>Going up one or several steps without holding on to the banister?<br/>Squatting or kneeling?<br/>Stooping or leaning down to pick up an object off the floor?<br/>Getting up from the floor without holding on to anything?<br/>Getting out of a low chair without armrests?<br/>Moving, generally, from a sitting position to a standing position?<br/>Carrying heavy objects (large bags full of shopping, saucepan filled with water, etc.)?<br/>Opening a bottle or a jar?<br/>Using public transport?<br/>Getting in or out of a car?<br/>Doing your shopping?<br/>Doing the housework (making the bed, Hoovering, doing the ironing, washing the dishes, etc.)?</p> | <p>ondakkinta heccu mahađiya meṭṭilannu hattuvudu<br/>byānistar(hyāṇḍ rēl) annu hiđidukoḷḷade ondu athavā halavāru mahađiya meṭṭilannu hattuvudu.<br/>Bagguvudu athavā maṇḍiyūruvudu<br/>kelage bidda vastuvannu baggi tegeyuvudu<br/>Yāvudē sahāyavillade neladinda mēlēḷuvudu<br/>kađime ettariruva ārms rest illade iruva kurciyinda mēlēḷuvudu<br/>sāmān'yavāgi kuḷitallinda mēlēḷuvudu<br/>bhārada vastuvannu ettuvudu(šāpiṅ tumbida bhāravāda cīlagaḷu, nīru tumbida bhārada pātre ityādi)<br/>bāṭali athavā jārina muccaḷa tereyuvudu<br/>Sārvajanika vāhanagaḷannu bałasuvudu kārannu hattuvudu athavā iḷiyuvudu<br/>šāpiṅ māđuvudu mane kelasavannu māđuvudu (hāsigejannu hāsuvudu, mađacuvudu, vyākyūm klīn annu māđuvudu, baṭṭeyannu istri māđuvudu, pātre toḷeyuvudu ityādi)</p> | <p>Meṭṭilugaḷannu hattuvudu<br/>tumbā meṭṭilugaḷannu hattuvudu<br/>kambagaḷannu hiđidukoḷḷade ondu athavā halavāru mahađiya meṭṭilugaḷannu hattuvudu<br/>nelada mēle kuḷitukoḷḷuvudu athavā maṇḍiyūruvudu<br/>Bāgi neladinda vastuvannu tegedukoḷḷuvudu<br/>yāvudē sahāyavillade neladinda mēlēḷuvudu<br/>Kaigaḷillada saṅga kurciyinda mēlēḷuvudu<br/>sāmān'yavāgi kuḷitukoḷḷuva sthānadinda nintu nađeyuvudu<br/>bhāravāda vastugaḷannu oyyuvudu (vastugaḷinda tumbida dođda cīlagaḷu, nīrininda tumbida lōhada bōguṇi, ityādi)<br/>Bāṭali athavā jār tereyuvudu<br/>sārvajanika sārigejannu bałasuvudu<br/>kārina oḷage hōguvudu athavā horage baruvudu vastugaḷannu kharīdi māđuvudu<br/>manegelasavannu māđuvudu<br/>(hāsigejannu sarimāđuvudu, istri māđuvudu, pātre gaḷannu toḷeyuvudu ityādi)</p> | <p>Ondu mahađiya meṭṭilannu hattuvudu<br/>ondakkinta heccu mahađiya meṭṭilannu hattuvudu<br/>byānistar(hyāṇḍ rēl) annu hiđidukoḷḷade ondu athavā halavāru mahađiya meṭṭilannu hattuvudu.<br/>Maṇḍiyūruvudu<br/>kelage bidda vastuvannu baggi tegeyuvudu<br/>yāvudē sahāyavillade neladinda mēlēḷuvudu<br/>kađime ettariruva (kaigaḷu) illade iruva kurciyinda mēlēḷuvudu<br/>sāmān'yavāgi kuḷitallinda mēlēḷuvudu<br/>bhāravāda vastuvannu ettuvudu(vastugaḷinda tumbida bhāravāda cīlagaḷu, nīru tumbida bhārada pātre ityādi)<br/>bāṭali athavā jārina muccaḷa tereyuvudu<br/>Sārvajanika sārigejannu bałasuvudu<br/>kārannu hattuvudu athavā iḷiyuvudu<br/>šāpiṅ (vastugaḷannu kharīdi) māđuvudu<br/>mane kelasavannu māđuvudu (hāsigejannu hāsuvudu mattu mađacuvudu, vyākyūm klīn annu māđuvudu, baṭṭeyannu istri māđuvudu, pātre toḷeyuvudu ityādi)</p> | <p>Climbing up to one floor<br/>Climbing up more than one floor<br/>Climbing several floors without holding railings<br/>Kneeling down<br/>Picking up the fallen things<br/>Getting up from the floor without anyone's help<br/>Getting up from a low armless chair<br/>Usually getting up from a seat<br/>Lifting heavy things (such as heavy bags/ bucket of water etc.)<br/>Opening the lif of a jar or bottle<br/>Using public transport<br/>Getting into or out of the car<br/>Going for shopping<br/>Doing household work (eg. making bed, using vaccum cleaner, ironing, cleaning utensils etc</p> | <p>Climbing the steps<br/>To the next floor?<br/>Climbing steps to more than one floor?<br/>Climbing steps to one or more floors without the support of hand rail?<br/>Kneeling down?<br/>Picking things that have fallen down?<br/>Getting up from floor without any support?<br/>Getting up from a chair without arms?<br/>Getting up without support from a sitting or squatting position?<br/>Lifting any heavy object such as a bag filled with goods, a Water pot etc.?<br/>Removing the cap/ thread of a bottle?<br/>Using a public transport vehicle/ boarding or getting down from bus etc.?<br/>Boarding or getting down from a car?<br/>Shopping (buying goods)?</p> | <p>Ondu mahađiya meṭṭilannu hattuvudu<br/>ondakkinta heccu mahađiya meṭṭilannu hattuvudu<br/>byānistar(hyāṇḍ rēl) annu hiđidukoḷḷade ondu athavā halavāru mahađiya meṭṭilannu hattuvudu.<br/>Kelage kuḷitukoḷḷuvudu/ maṇḍiyūruvudu<br/>kelage bidda vastuvannu ettikoḷḷuvudu<br/>yāvudē sahāyavillade neladinda mēlēḷuvudu<br/>Kađime ettariruva kaigaḷillada (ārms rest) iruva kurciyinda mēlēḷuvudu<br/>sāmān'yavāgi kuḷitallinda mēlēḷuvudu<br/>bhārada vastuvannu ettuvudu(bhāravāda cīlagaḷu, nīru tumbida bhārada pātre ityādi)<br/>bāṭali athavā jārina muccaḷa tereyuvudu<br/>sārvajanika sārigejannu bałasuvudu<br/>kārannu hattuvudu athavā iḷiyuvudu<br/>šāpiṅ (vastugaḷannu kharīdi) māđuvudu<br/>Mane kelasavannu māđuvudu (hāsigejannu hāsuvudu mattu mađacuvudu, vyākyūm klīn māđuvudu, baṭṭeyannu istri māđuvudu, pātre toḷeyuvudu ityādi)</p> |  | <p>ondakkinta heccu mahađiya meṭṭilannu hattuvudu<br/>meṭṭilu hattuvāga gōđe athavā bēre yāvudara sahāyavillade ondu athavā halavāru meṭṭilugaḷannu hattuvudu<br/>kelage kuḷitukoḷḷuvudu/ maṇḍiyūruvudu<br/>kelage bidda vastuvannu ettikoḷḷuvudu<br/>Yāvudē sahāyavillade neladinda mēlēḷuvudu<br/>kađime ettara iruva kaigaḷillada athavā hiđiyalu ēnū illada kurciyinda ḷuvudu<br/>sāmān'yavāgi kuḷitallinda mēlēḷuvudu<br/>bhārada vastuvannu ettuvudu (bhāravāda cīlagaḷu, nīru tumbida bhārada pātre ityādi)<br/>bāṭali athavā jārina muccaḷa tereyuvudu<br/>Sārvajanika sārigejannu bałasuvudu<br/>kārannu hattuvudu athavā iḷiyuvudu<br/>šāpiṅ (vastugaḷannu kharīdi) māđuvudu<br/>mane kelasavannu māđuvudu (hāsigejannu hāsuvudu mattu mađacuvudu, guđisuvudu, oresuvudu, baṭṭeyannu istri māđuvudu, pātre toḷeyuvudu ityādi)</p> |
|--|-------------------------------------------------------------------------------------------------------------------------------------------------------------------------------------------------------------------------------------------------------------------------------------------------------------------------------------------------------------------------------------------------------------------------------------------------------------------------------------------------------------------------------------------------------------------------------------------------------------------------------------------------------------------------------------------------------------------------------------------------------|----------------------------------------------------------------------------------------------------------------------------------------------------------------------------------------------------------------------------------------------------------------------------------------------------------------------------------------------------------------------------------------------------------------------------------------------------------------------------------------------------------------------------------------------------------------------------------------------------------------------------------------------------------------------------------------------------------------------------------------------------------------------------------------------|-----------------------------------------------------------------------------------------------------------------------------------------------------------------------------------------------------------------------------------------------------------------------------------------------------------------------------------------------------------------------------------------------------------------------------------------------------------------------------------------------------------------------------------------------------------------------------------------------------------------------------------------------------------------------------------------------------------------------------------------------------------------------------------------------------------|---------------------------------------------------------------------------------------------------------------------------------------------------------------------------------------------------------------------------------------------------------------------------------------------------------------------------------------------------------------------------------------------------------------------------------------------------------------------------------------------------------------------------------------------------------------------------------------------------------------------------------------------------------------------------------------------------------------------------------------------------------------------------------------------------------------------------------------------------------------|-----------------------------------------------------------------------------------------------------------------------------------------------------------------------------------------------------------------------------------------------------------------------------------------------------------------------------------------------------------------------------------------------------------------------------------------------------------------------------------------------------------------------------------------------------------------------------------------------------------|---------------------------------------------------------------------------------------------------------------------------------------------------------------------------------------------------------------------------------------------------------------------------------------------------------------------------------------------------------------------------------------------------------------------------------------------------------------------------------------------------------------------------------------------------------------------------------------------------------------------------------------------------------------------------------|----------------------------------------------------------------------------------------------------------------------------------------------------------------------------------------------------------------------------------------------------------------------------------------------------------------------------------------------------------------------------------------------------------------------------------------------------------------------------------------------------------------------------------------------------------------------------------------------------------------------------------------------------------------------------------------------------------------------------------------------------------------------------------------------------------------------------------------------------------------|--|---------------------------------------------------------------------------------------------------------------------------------------------------------------------------------------------------------------------------------------------------------------------------------------------------------------------------------------------------------------------------------------------------------------------------------------------------------------------------------------------------------------------------------------------------------------------------------------------------------------------------------------------------------------------------------------------------------------------------------------------------------------------------------------------------------------------------------------------|

|    |                                                                                                                                                                                                                  |                                                                                                                                                                                                                                                           |                                                                                                                                                                                                                    |                                                                                                                                                                                                                                                 |                                                                                                                                                                                                |                                                                                                                                                                                                                                                                                                                          |                                                                                                                                                                                                                  |  |                                                                                                                                                                                                                  |
|----|------------------------------------------------------------------------------------------------------------------------------------------------------------------------------------------------------------------|-----------------------------------------------------------------------------------------------------------------------------------------------------------------------------------------------------------------------------------------------------------|--------------------------------------------------------------------------------------------------------------------------------------------------------------------------------------------------------------------|-------------------------------------------------------------------------------------------------------------------------------------------------------------------------------------------------------------------------------------------------|------------------------------------------------------------------------------------------------------------------------------------------------------------------------------------------------|--------------------------------------------------------------------------------------------------------------------------------------------------------------------------------------------------------------------------------------------------------------------------------------------------------------------------|------------------------------------------------------------------------------------------------------------------------------------------------------------------------------------------------------------------|--|------------------------------------------------------------------------------------------------------------------------------------------------------------------------------------------------------------------|
|    |                                                                                                                                                                                                                  |                                                                                                                                                                                                                                                           |                                                                                                                                                                                                                    |                                                                                                                                                                                                                                                 |                                                                                                                                                                                                | Doing household work (such as doing bed and Folding the bed, using vacuum cleaner Washing dishes etc.)?                                                                                                                                                                                                                  |                                                                                                                                                                                                                  |  |                                                                                                                                                                                                                  |
| 18 | Does your muscle weakness limit your movement?<br>Yes, a lot<br>Yes, somewhat<br>Yes, a little<br>No, not at all                                                                                                 | Nim'ma snāyu (mānsakhaṇḍada) daurbalyavu nim'ma calaneyannu mitigoḷisuttideyē?<br>Haudu, tumbā haudu, svalpamaṭṭige haudu, svalpa illa, illavē illa                                                                                                       | Nim'ma snāyu daurbalyavu nim'ma calaneyannu mitigoḷisuttideyē?<br>Haudu, tumbā haudu, svalpamaṭṭige haudu svalpa illa, illavē illa                                                                                 | Nim'ma snāyu (mānsakhaṇḍada) daurbalyavu nim'ma calaneyannu mitigoḷisuttideyē?<br>Haudu, tumbā haudu, svalpamaṭṭige haudu, svalpa illavē illa                                                                                                   | Does your muscle weakness restrict your movement?<br>Yes, a lot<br>Yes, sometimes<br>Yes, a little<br>No, not at all                                                                           | Do you think that the weakness of muscles has restricted your movement?<br>Yes, to a great extent<br>Yes, to some extent<br>Yes, a little<br>No, Never                                                                                                                                                                   | Nim'ma snāyu (mānsakhaṇḍada) daurbalyavu nim'ma calaneyannu aḍḍigoḷisuttideyē?<br>Haudu, tumbā haudu, svalpamaṭṭige haudu, svalpa illavē illa                                                                    |  | Nim'ma snāyu (mānsakhaṇḍada) daurbalyavu nim'ma calaneyannu aḍḍigoḷisuttideyē?<br>Haudu, tumbā haudu, svalpamaṭṭige haudu, svalpa illavē illa                                                                    |
| 19 | If yes to question 18, for what reasons? (Choose as many answers as you like)<br>Fear of pain<br>Fear that you might not be able to<br>Fear of feeling tired after these activities<br>Fear of falling<br>Other: | Hadineṭṭaneya (18 nē) praśnege uttara"haudu" endādare, ēke? (Nimage iṣṭavādantaha ondakkinta heccina āykeyannu āydukoḷḷi)<br>Nōvina bhaya nim'minda sādhyavāgadirabahudu emba bhaya<br>ī caṭuvaḷikegaḷa nantara daṇida bhāvaneya bhaya bīḷuva bhaya itare | 18Nē praśnege haudādare, yāva kāraṇagaligāgi? (Nimage bekāda uttaragaḷannu āykemāḍi)<br>Nōvina bhaya nimage sādhyavāgadirabahudu emba bhaya<br>ī caṭuvaḷikegaḷa nantara daṇida bhāvaneya bhaya bīḷuva bhaya itare: | 18 Nē praśnege uttara"haudu" endādare, ēke? (Nimage iṣṭavādantaha ondakkinta heccina āykeyannu āydukoḷḷabahudu)<br>Nōvina bhaya nim'minda sādhyavāgadirabahudu emba bhaya<br>ī caṭuvaḷikegaḷa nantara daṇida bhāvaneya bhaya bīḷuva bhaya itare | If your answer is yes, Why? (Choose the relevant one or more option)<br>Scared of pain<br>Scared that you can't do it<br>Feeling of tiredness after the activity<br>Scared of falling<br>Other | If your answer to the 18th question is 'yes', why do you think so? (You can choose more than one of the following options)<br>Fear that you get pain<br>Fear that you get cannot complete the task<br>Apprehensive about the pain that you would get after doing the task<br>Fear that you triple down<br>Any other fear | 18 Nē praśnege uttara"haudu" endādare, ēke? (Nim'ma āykegaḷannu āydukoḷḷabahudu)<br>Nōvina bhaya nim'minda sādhyavāgadirabahudu emba bhaya<br>ī caṭuvaḷikegaḷa nantara daṇida bhāvaneya bhaya bīḷuva bhaya itare |  | 18 Nē praśnege uttara"haudu" endādare, ēke? (Nim'ma āykegaḷannu āydukoḷḷabahudu)<br>Nōvina bhaya nim'minda sādhyavāgadirabahudu emba bhaya<br>ī caṭuvaḷikegaḷa nantara daṇida bhāvaneya bhaya bīḷuva bhaya itare |
| 20 | Does your muscle weakness limit your sex life?<br>I am not sexually active<br>Yes, completely<br>Yes, somewhat                                                                                                   | Nim'ma daihika durbalate nim'ma laingika jīvanakke aḍḍiyāguttadeyē?<br>Nānu laingika āsaktiyannu hondilla<br>haudu, sampūrnavāgi haudu, svalpamaṭṭige                                                                                                     | Nim'ma snāyu daurbalyavu nim'ma laingika jīvanavannu mitigoḷisuttideyē?<br>Nānu laingikavāgi sakriyavāgilla                                                                                                        | Nim'ma snāyuvina durbalate nim'ma laingika jīvanakke aḍḍiyāguttadeyē?<br>Nānu laingika āsaktiyannu hondilla<br>haudu, sampūrnavāgi haudu, svalpamaṭṭige                                                                                         | Does your muscle weakness interrupt your married life?<br>Not interested<br>Yes completely<br>Yes sometimes                                                                                    | Is the weakness of muscles a hindrance to your sexual performance?<br>I don't have interest in sex                                                                                                                                                                                                                       | Nim'ma snāyuvina durbalate nim'ma laingika jīvanakke aḍḍiyāguttadeyē?<br>Nānu laingika āsaktiyannu hondilla (laingikavāgi sakriyavāgilla)                                                                        |  | Nim'ma snāyuvina (mānsakhaṇḍada) durbalate nim'ma laingika jīvanakke aḍḍiyāguttadeyē?<br>Nānu laingika āsaktiyannu hondilla (laingikavāgi sakriyavāgilla)                                                        |

|    |                                                                                                                                                                                                                                                                                                             |                                                                                                                                                                                                                                                                                                                                                                                                                               |                                                                                                                                                                                                                                                                                                                                |                                                                                                                                                                                                                                                                                                                                                                                                                                     |                                                                                                                                                                                                                                                                                                                                                               |                                                                                                                                                                                                                                                                                                                                                                                    |                                                                                                                                                                                                                                                                                                                                                                                                                                                  |  |                                                                                                                                                                                                                                                                                                                                                                                                                                                       |
|----|-------------------------------------------------------------------------------------------------------------------------------------------------------------------------------------------------------------------------------------------------------------------------------------------------------------|-------------------------------------------------------------------------------------------------------------------------------------------------------------------------------------------------------------------------------------------------------------------------------------------------------------------------------------------------------------------------------------------------------------------------------|--------------------------------------------------------------------------------------------------------------------------------------------------------------------------------------------------------------------------------------------------------------------------------------------------------------------------------|-------------------------------------------------------------------------------------------------------------------------------------------------------------------------------------------------------------------------------------------------------------------------------------------------------------------------------------------------------------------------------------------------------------------------------------|---------------------------------------------------------------------------------------------------------------------------------------------------------------------------------------------------------------------------------------------------------------------------------------------------------------------------------------------------------------|------------------------------------------------------------------------------------------------------------------------------------------------------------------------------------------------------------------------------------------------------------------------------------------------------------------------------------------------------------------------------------|--------------------------------------------------------------------------------------------------------------------------------------------------------------------------------------------------------------------------------------------------------------------------------------------------------------------------------------------------------------------------------------------------------------------------------------------------|--|-------------------------------------------------------------------------------------------------------------------------------------------------------------------------------------------------------------------------------------------------------------------------------------------------------------------------------------------------------------------------------------------------------------------------------------------------------|
|    | Yes, a little<br>No, not at all                                                                                                                                                                                                                                                                             | haudu, svalpa<br>illa, illavē illa                                                                                                                                                                                                                                                                                                                                                                                            | haudu, sampūrṇavāgi<br><br>haudu, svalpamattīge<br><br>haudu svalpa<br><br>illa, illavē illa                                                                                                                                                                                                                                   | haudu, svalpa<br>illa, illavē illa                                                                                                                                                                                                                                                                                                                                                                                                  | Yes a little<br>No, not at all                                                                                                                                                                                                                                                                                                                                | Yes, a total<br>hindrance<br>Yes, to some<br>extent<br>A little.<br>No, never                                                                                                                                                                                                                                                                                                      | haudu, sampūrṇavāgi<br>haudu, svalpamattīge<br>haudu, svalpa<br>illa, illavē illa                                                                                                                                                                                                                                                                                                                                                                |  | haudu, sampūrṇavāgi<br>haudu, svalpamattīge<br>haudu, svalpa<br>illa, illavē illa                                                                                                                                                                                                                                                                                                                                                                     |
| 21 | How has your<br>participation in<br>physical<br>activities/sport<br>changed?<br>Increased<br>Decreased<br>Unchanged<br>I have never<br>participated in physical<br>activities or sports                                                                                                                     | Nim'ma daihika caṭuvaṭike/<br>krīḍegaḷalli<br>bhāgavahisuvike hēge<br>badalāvaṇeyāgide?<br>Heccāgide<br>kaḍimeyāgide<br>ēnū badalāgilla<br>nānu endigū daihika<br>caṭuvaṭike/ krīḍegaḷalli<br>bhāgavahisilla                                                                                                                                                                                                                  | Daihika<br>caṭuvaṭike/krīḍeyalli<br>nim'ma<br>bhāgavahisuvike<br>badalāgideyē?<br>Heccāgide<br><br>kaḍimeyāgide<br><br>badalāvaṇe illa<br><br>nānu endigū daihika<br>caṭuvaṭike athavā<br>krīḍegaḷalli<br>bhāgavahisallilla                                                                                                    | Nim'ma daihika caṭuvaṭike/<br>krīḍegaḷalli bhāgavahisuvike<br>hēge badalāvaṇeyāgide?<br>Heccāgide<br>kaḍimeyāgide<br>ēnū badalāgilla<br>nānu endigū daihika<br>caṭuvaṭike/ krīḍegaḷalli<br>bhāgavahisilla                                                                                                                                                                                                                           | How do you think<br>your physical<br>activity and<br>sports activities<br>have changed?<br>It has increased<br>It has reduced<br>No change<br>I was not taking<br>part in any<br>physical/sport<br>activity                                                                                                                                                   | How have your<br>movements/<br>Physical<br>activities and<br>participation in<br>sports changed?<br>It has increased<br>It has decreased<br>No Changes<br>I haven't<br>participated in<br>physical<br>exercises or<br>sports.                                                                                                                                                      | Nim'ma daihika<br>caṭuvaṭike/ krīḍegaḷalli<br>bhāgavahisuvike hēge<br>badalāgide?<br>Heccāgide<br>kaḍimeyāgide<br>ēnū badalāgilla<br>nānu endigū daihika<br>caṭuvaṭike/ krīḍegaḷalli<br>bhāgavahisilla                                                                                                                                                                                                                                           |  | Nim'ma daihika caṭuvaṭike/<br>krīḍegaḷalli bhāgavahisuvike<br>hēge badalāgide?<br>Heccāgide<br>kaḍimeyāgide<br>ēnū badalāgilla<br>nānu endigū daihika caṭuvaṭike/<br>krīḍegaḷalli bhāgavahisilla                                                                                                                                                                                                                                                      |
| 22 | How has your<br>participation in leisure<br>activities (going out to<br>eat, gardening, doing<br>DIY, shooting/fishing,<br>senior citizens clubs,<br>playing bridge, going<br>for a walk, etc.)<br>changed?<br>Increased<br>Decreased<br>Unchanged<br>I have never<br>participated in leisure<br>activities | Biḍuvina (virāma)<br>samayada caṭuvaṭikegaḷalli<br>nim'ma bhāgavahisuvike<br>hēge (tinnalu horage<br>hōguvudu, tōtagārike,<br>nimage iṣṭavāda yāvudē<br>kelasavannu māḍuvudu,<br>śūṭiṅg/ mīnugārike, hiriya<br>nāgarikara klabge<br>hōguvudu, kārd(istīṭ)<br>āḍuvudu, vākiṅg<br>māḍuvudu) badalāgideyē?<br>Heccāgide<br>kaḍimeyāgide<br>ēnū badalāgilla<br>nānu endigū daihika<br>caṭuvaṭike/ krīḍegaḷalli<br>bhāgavahisilla. | Virāmada<br>caṭuvaṭikegaḷalli<br>(tinnalu hōguvudu,<br>tōtagārike,<br>śūṭiṅg/mīnugārike,<br>hiriya nāgarikara klab<br>gaḷu, āḍuvudu,<br>naḍeyuvudu, ityādi)<br>nim'ma<br>bhāgavahisuvike hēge<br>badalāgide?<br>Heccāgide<br>kaḍimeyāgide<br>badalāvaṇe illa<br>nānu endigū virāmada<br>caṭuvaṭikegaḷalli<br>bhāgavahisallilla | Hēge nim'ma biḍuvina<br>(virāmada) samayada<br>caṭuvaṭikegaḷa<br>bhāgavahisuvike (tinnalu<br>horage hōguvudu,<br>tōtagārike, nimage iṣṭavāda<br>yāvudē kelasavannu<br>māḍuvudu, śūṭiṅg/ mīnu<br>hiḍiyuvudu, hiriya<br>nāgarikara klabge hōguvudu,<br>kārd(istīṭ) āḍuvudu, vākiṅg<br>māḍuvudu ityādi)<br>badalāgide?<br>Heccāgide<br>kaḍimeyāgide<br>ēnū badalāgilla<br>nānu endigū virāmada<br>caṭuvaṭikegaḷalli<br>bhāgavahisilla. | Does your free<br>time activities<br>(going to eat,<br>gardening, doing<br>your favourite<br>activity, shooting,<br>fishing, going to<br>senior citizen<br>club, playing<br>cards, walking<br>etc.) have<br>changed?<br>It has increased<br>It has become<br>less<br>There has been<br>no change<br>I have never<br>engaged in any<br>free time<br>activities | How have your<br>leisurely,<br>outdoor<br>activities<br>changed? (For<br>example, going<br>out to eat,<br>farming, doing<br>an activity that<br>you like,<br>shooting/<br>fishing, going to<br>a club, playing<br>cards playing<br>games and<br>walking etc.)<br>It has increased<br>It has decreased<br>No Changes<br>I haven't<br>participated in<br>any leisurely<br>activities | Nim'ma biḍuvina<br>(virāmada) samayada<br>caṭuvaṭikegaḷalli (tinnalu<br>horage hōguvudu,<br>tōtagārike, nimage<br>iṣṭavāda yāvudē<br>kelasavannu māḍuvudu,<br>śūṭiṅg/ mīnu hiḍiyuvudu,<br>hiriya nāgarikara klabge<br>hōguvudu, kārd(istīṭ)<br>āḍuvudu, vākiṅg<br>māḍuvudu ityādi) nim'ma<br>bhāgavahisuvike hēge<br>badalāgide?<br>Heccāgide<br>kaḍimeyāgide<br>ēnū badalāgilla<br>nānu endigū virāmada<br>caṭuvaṭikegaḷalli<br>bhāgavahisilla. |  | Nim'ma biḍuvina (virāmada)<br>samayada caṭuvaṭikegaḷalli<br>(samārambhagaḷalli<br>bhāgavahisuvudu, tōtagārike,<br>nimage iṣṭavāda yāvudē<br>kelasavannu māḍuvudu,<br>makkaḷondige āṭa āḍuvudu,<br>hiriya nāgarikara klabge<br>hōguvudu, kārd(istīṭ) āḍuvudu,<br>vākiṅg māḍuvudu ityādi)<br>nim'ma bhāgavahisuvike hēge<br>badalāgide?<br>Heccāgide<br>kaḍimeyāgide<br>ēnū badalāgilla<br>nānu endigū virāmada<br>caṭuvaṭikegaḷalli<br>bhāgavahisilla. |
